# Supplementary material for: Evaluation of Salmonella Typhimurium Lacking fruR, ssrAB, or hfq as a Prophylactic Vaccine against Salmonella Lethal Infection
Source: MDPI journal article supplement (doi:10.3390/vaccines10091413), 2022-08-28
Supplement: s1 [file s1]

**Supplement Table S1. Bacterial strains and plasmids used in this study**

| Strains    | Relevant characteristics                                              | References |
|------------|-----------------------------------------------------------------------|------------|
| ST1120     | Wild-type <i>S. Typhimurium</i> isolated in Korea                     | [1]        |
| ST2165     | $\Delta fruR$                                                         | [2]        |
| ST2166     | $\Delta ssrAB$                                                        | [2]        |
| ST2167     | $\Delta hfq$                                                          | [2]        |
| ST14028    | ATCC14028                                                             | ATCC       |
| ST2173     | ST14028 with plasmid pBBR1-MCS4 (AM <sup>R</sup> )                    | [3]        |
| Plasmids   | Characteristics                                                       |            |
| pCP20      | FLP recombinase, temperature-sensitive replication (AM <sup>R</sup> ) | [4]        |
| pBBR1-MCS4 | Broad-host-range cloning vector (AM <sup>R</sup> )                    | [5]        |

**Supplement Table S2. Primers used in this study**

| <b>Primer</b>    | <b>Sequence (5' to 3')</b> |
|------------------|----------------------------|
| <i>fruR</i> _DF  | CATCGGTGGGCTTTTTTTTG       |
| <i>fruR</i> _DR  | TGTCAAGCAAGTCACAACG        |
| <i>ssrAB</i> -DF | TTGAAGCATCGTCTCCTG         |
| <i>ssrAB</i> _DR | GGCGATTCTATCATTCGG         |
| <i>hfq</i> _DF   | CAGGTTTTGAAGCAGAAGTC       |
| <i>hfq</i> _DR   | TTCAACTGCCTTACCTTCAC       |

**Supplement Table S3. Analysis of the biochemical phenotypes of the *S. Typhimurium*  $\Delta fruR$** **mutant strain**

| <b>Biochemical phenotypes</b> | <b>Strain characteristics</b> |                                 |                                  |                                |
|-------------------------------|-------------------------------|---------------------------------|----------------------------------|--------------------------------|
|                               | <b>Wild-type</b>              | <b><math>\Delta fruR</math></b> | <b><math>\Delta ssrAB</math></b> | <b><math>\Delta hfq</math></b> |
| Acetoin production            | –                             | –                               | –                                | –                              |
| <u>Amygdalin fermentation</u> | –                             | +                               | +                                | +                              |
| Arabinose fermentation        | +                             | +                               | +                                | +                              |
| <u>Arginine dihydrolase</u>   | +                             | –                               | –                                | –                              |
| <u>Citrate utilization</u>    | +                             | –                               | –                                | –                              |
| $\beta$ -Galactosidase        | –                             | –                               | –                                | –                              |
| Gelatinase                    | –                             | –                               | –                                | –                              |
| Glucose fermentation          | +                             | +                               | +                                | +                              |
| H <sub>2</sub> S production   | +                             | +                               | +                                | +                              |
| Indole production             | –                             | –                               | –                                | –                              |
| Inositol fermentation         | +                             | +                               | +                                | +                              |
| <u>Lysine decarboxylase</u>   | +                             | –                               | –                                | –                              |
| Mannitol fermentation         | +                             | +                               | +                                | +                              |
| Melibiose fermentation        | +                             | +                               | +                                | +                              |
| Ornithine decarboxylase       | +                             | +                               | +                                | +                              |
| Rhamnose fermentation         | +                             | +                               | +                                | +                              |
| Sorbitol fermentation         | +                             | +                               | +                                | +                              |
| <u>Sucrose fermentation</u>   | –                             | +                               | +                                | +                              |
| Tryptophan deaminase          | –                             | –                               | –                                | –                              |
| Urease                        | –                             | –                               | –                                | –                              |

Supplement Figure S1.

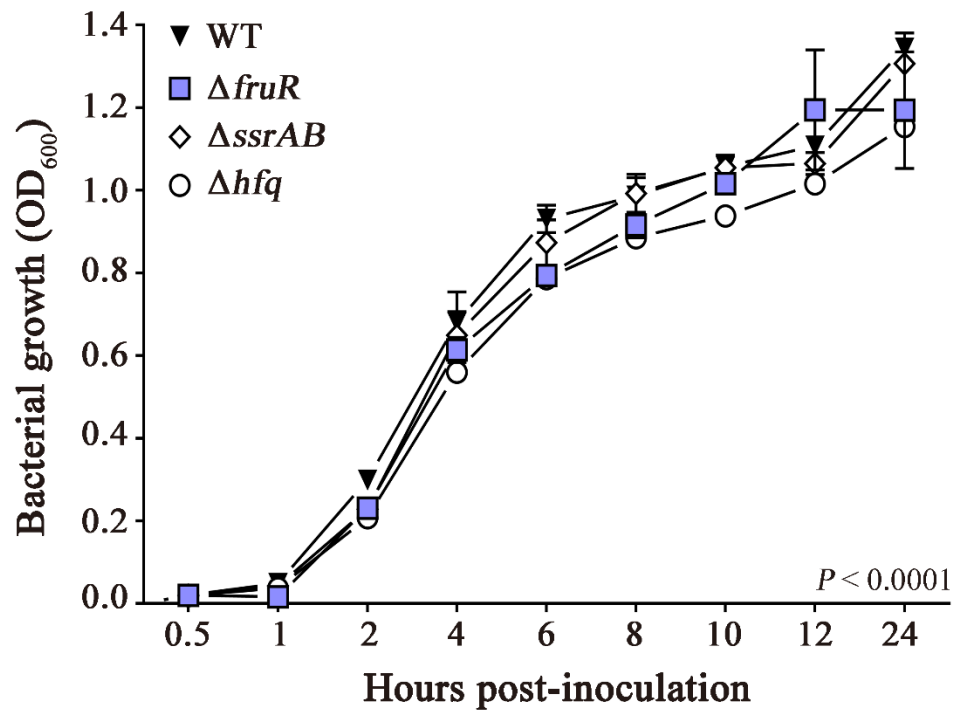

**Supplementary Figure S1.** Measurement of bacterial growth in the  $\Delta fruR$  mutant in LB broth. Growth curve of ST mutant strains ( $\Delta fruR$ ,  $\Delta ssrAB$ , and  $\Delta hfq$ ) and WT strains that were cultured in LB broth. The OD<sub>600</sub> values indicated at each time point represent the average of three replicates.

**Supplement Figure S2.**

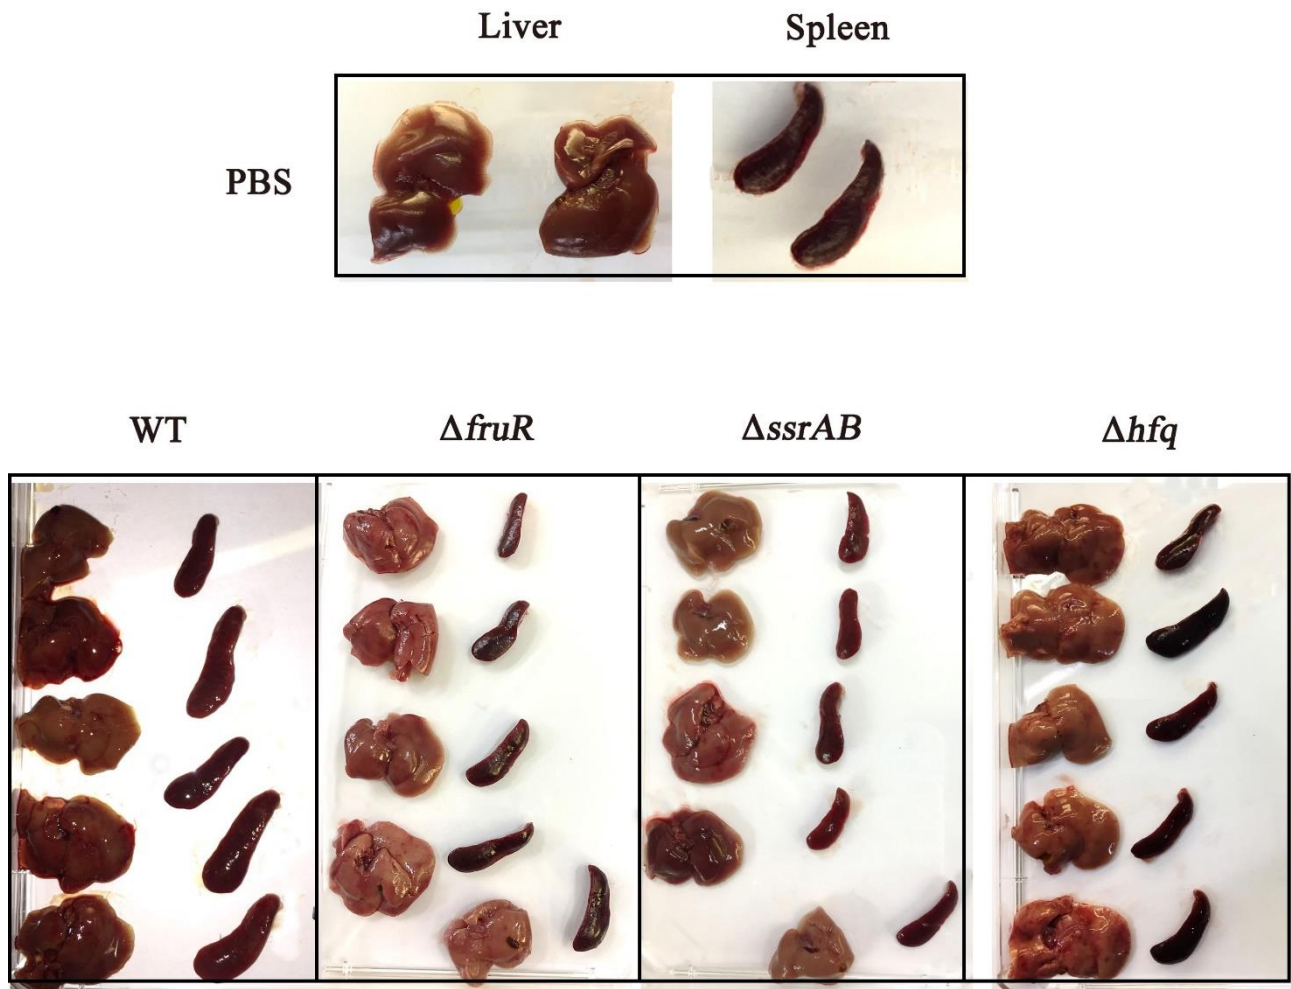

**Supplementary Figure S2.** The enlarged livers and spleens of mice immunized with each strain after challenge. The mice that were immunized with ST mutant strains ( $\Delta fruR$ ,  $\Delta ssrAB$ , or  $\Delta hfq$ ) or WT strains were sacrificed and their organs (liver and spleen) were collected and observed. The PBS negative (N) control was not challenged.

## References

1. Kim, S.; Kim, E.; Park, S.; Hahn, T. W.; Yoon, H. Genomic approaches for understanding the characteristics of *Salmonella enterica* subsp. *enterica* serovar Typhimurium ST1120, isolated from swine feces in Korea. *J. Microbiol. Biotechnol.* **2017**, *27*, 1983–1993.
2. Yoon, H.; McDermott, J. E.; Porwollik, S.; McClelland, M.; Heffron, F. Coordinated regulation of virulence during systemic infection of *Salmonella enterica* serovar Typhimurium. *PLoS Pathog.* **2009**, *5*, e1000306.
3. Park, S.; Jung, B.; Kim, E.; Hong, S. T.; Yoon, H.; Hahn, T. W. *Salmonella* Typhimurium lacking YjeK as a candidate live attenuated vaccine against invasive *Salmonella* infection. *Front Immunol.* **2020**, *11*, 1277.
4. Datsenko, K.A.; Wanner, B.L. One-step inactivation of chromosomal genes in *Escherichia coli* K-12 using PCR products. *Proc. Natl. Acad. Sci. U S A.* **2000**, *97*, 6640–6645.
5. Truong, Q.L.; Cho, Y.; Park, S.; Park, B. K.; Hahn, T. W. *Brucella abortus* mutants lacking ATP-binding cassette transporter proteins are highly attenuated in virulence and confer protective immunity against virulent *B. abortus* challenge in BALB/c mice. *Microb. Pathog.* **2016**, *95*, 175–185.
